# Supplementary material
Source: publisher figshare collection journal article supplement (https://asha.figshare.com/ndownloader/files/26428856)
Supplement: Supplementary file 1 [file 26428856]

## Sheet: Sheet1
Supplemental material, Harris et al., "A Longitudinal Comparison of Environmental Sound Recognition in Adults With Hearing Aids Before and After Cochlear Implantation," JSLHR, https://doi.org/10.1044/2020_JSLHR-20-00400
	Confusion Matrix - Percent Correct Pre-Cochlear Implant
	alarm ringing	dog barking	birds chirping	busy signal	car crashing	dial tone	phone dialing	dog panting	door closing	doorbell ring	car driving	fog horn	footsteps	car horn	phone ringing	phone receiver pick-up	police siren	rooster	seagulls	snoring	water splashing	tires screeching	horse trotting	waves crashing	yawning
alarm ringing	15					5	5			10	5				15					20		5		15	5
dog barking		75						15	5										5
birds chirping			65									5		5			5		5	5				5	5
busy signal				80		15										5
car crashing					65				5											5		5		20
dial tone				15		75						5			5
phone dialing				5		10	75									10
dog panting			5					70					15					5						5
door closing									100																5
doorbell ring	5									85		5											5
car driving	5				10						45	10									10	10		10
fog horn	5					5						85													5
footsteps					10	5	5				10		35								5			30
car horn												10		90
phone ringing	5		5				5			5					60		5					5			10
phone receiver pick-up	5			5					20	5		5	20			35							5
police siren												5		5			85	5
rooster										10								90
seagulls			15		10				5		5	5					5		40	5				10
snoring		5			5									5						75		5		5
water splashing					10				10												50			30
tires screeching			5		10													5	15	20		35		5	5
horse trotting					10				5		5		25	5		5					5		10	30
waves crashing											20									5	5			70
yawning									5			5								10					80
																								MEAN % Correct	63.6
	Confusion Matrix - Percent Correct Six-Months Post-Cochlear Implant
	alarm ringing	dog barking	birds chirping	busy signal	car crashing	dial tone	phone dialing	dog panting	door closing	doorbell ring	car driving	fog horn	footsteps	car horn	phone ringing	phone receiver pick-up	police siren	rooster	seagulls	snoring	water splashing	tires screeching	horse trotting	waves crashing	yawning
alarm ringing	50										10				15						5		5	15
dog barking		85						15
birds chirping			90												5									5
busy signal				70		20						5				5
car crashing	5				55							5										5		30
dial tone	5			25		40	5					15		5		5
phone dialing		5				35	60
dog panting				5	5			80											5				5
door closing									95																5
doorbell ring						5				95
car driving	5				5				5		50			5						10	5			15
fog horn				5							5	85		5
footsteps					25		5						15									15		40
car horn												10		90
phone ringing	5					5									85				5
phone receiver pick-up				5					35	5			10			40			5
police siren																	100
rooster																		100
seagulls	5					5					10			5			10	5	50		5	5
snoring				5	5	5				5		10	5	5					5	55
water splashing					5				5		5									5	55			25
tires screeching	10		5		5			5		5	5				5	5		15	5		5	20			10
horse trotting			5	5			5						10								15		20	40
waves crashing											15									5		5		75
yawning										5		10						5	5						75
																								MEAN % Correct	65.4
